# Supplementary material
Source: Springer Nature journal article supplement (https://www.springermedizin.de/resource/supplementary/12876_2014_1143_MOESM6_ESM.pdf/9438180)

# Quality of Sleep

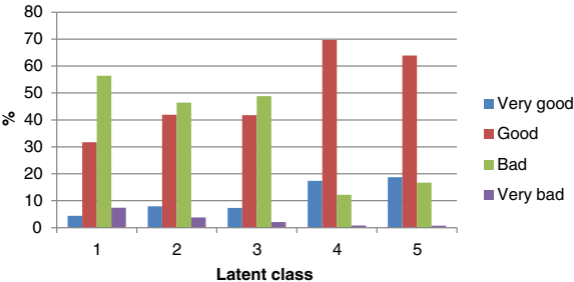

Supplement: MOESM6 [file 9438180]
